# Supplementary material
Source: Springer Nature journal article supplement (https://www.springermedizin.de/resource/supplementary/13054_2013_2511_MOESM3_ESM.pdf/9714184)

Figure 3

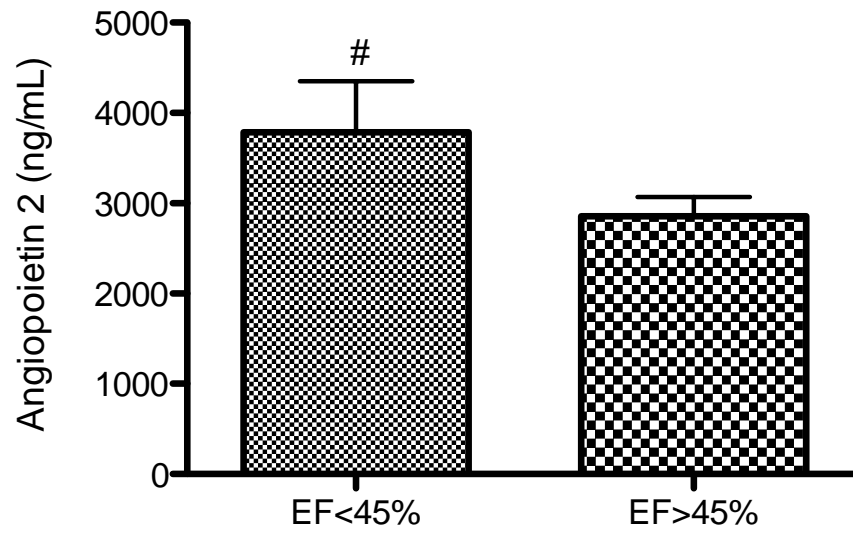

Supplement: MOESM3 [file 9714184]
